# Supplementary material
Source: PubMed Central journal article supplement (PMC3779899)
Supplement: jbjs_95_19_e139_ds01.pdf [file jbjs_95_19_e139_ds01.pdf]

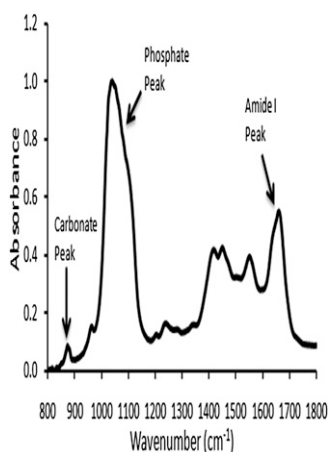

Fig. E-1  
Typical FTIR spectrum of bone. Spectra were analyzed with use of the carbonate peak (indicating carbonate substitution into hydroxyapatite) between 850 and 890  $\text{cm}^{-1}$ , the phosphate peak (mineral) between 900 and 1200  $\text{cm}^{-1}$ , and the amide I peak (matrix) between 1590 and 1720  $\text{cm}^{-1}$ .

| TABLE E-1 Parameters of Bone Structure, Microarchitecture, Turnover, and Mineralization |                                      |                     |                                  |                     |                                |                     |
|-----------------------------------------------------------------------------------------|--------------------------------------|---------------------|----------------------------------|---------------------|--------------------------------|---------------------|
|                                                                                         | Non-Low BMD<br>(Group 1,<br>N = 25)* | P Value,<br>1 vs. 2 | Low BMD<br>(Group 2,<br>N = 18)* | P Value,<br>2 vs. 3 | Controls<br>(Group 3, N = 14)* | P Value,<br>1 vs. 3 |
| Cancellous bone volume/tissue volume (%)                                                | 20.9 ± 4.41                          | 0.001               | 14.9 ± 4.13                      | 0.01                | 20.1 ± 4.12                    | >0.1                |
| Trabecular separation ( $\mu\text{m}$ )                                                 | 429 ± 86.3                           | 0.001               | 620 ± 242                        | 0.01                | 428 ± 69.1                     | >0.1                |
| Trabecular thickness ( $\mu\text{m}$ )                                                  | 114 ± 23.4                           | >0.1                | 100 ± 17.8                       | >0.1                | 107 ± 23.9                     | >0.1                |
| Bone formation rate/bone surface area ( $\text{mm}^3/\text{cm}^2/\text{yr}$ )           | 1.34 ± 0.98                          | >0.1                | 1.41 ± 1.33                      | >0.1                | 1.97 ± 0.99                    | >0.1                |
| Osteoid thickness ( $\mu\text{m}$ )                                                     | 10.3 ± 4.23                          | >0.1                | 9.73 ± 3.87                      | >0.1                | 9.08 ± 3.49                    | >0.1                |
| Mineralization lag time (d)                                                             | 40.3 ± 39.3                          | >0.1                | 31.2 ± 16.1                      | >0.1                | 47.0 ± 29.8                    | >0.1                |
| *The values are given as the mean and the standard deviation.                           |                                      |                     |                                  |                     |                                |                     |

| TABLE E-2 Parameters of Bone Mineral Quality                  |                                   |                     |                               |                     |                                |                     |
|---------------------------------------------------------------|-----------------------------------|---------------------|-------------------------------|---------------------|--------------------------------|---------------------|
|                                                               | Non-Low BMD<br>(Group 1, N = 25)* | P Value,<br>1 vs. 2 | Low BMD<br>(Group 2, N = 18)* | P Value,<br>2 vs. 3 | Controls<br>(Group 3, N = 14)* | P Value,<br>1 vs. 3 |
| Collagen crosslinking ratio                                   | 4.12 ± 0.46                       | <0.001              | 3.58 ± 0.33                   | >0.1                | 3.60 ± 0.30                    | <0.001              |
| Mineral-to-matrix ratio                                       | 4.16 ± 0.39                       | >0.1                | 3.93 ± 0.61                   | >0.1                | 3.83 ± 0.44                    | >0.1                |
| Carbonate-to-phosphate ratio × 100                            | 1.04 ± 0.08                       | >0.1                | 1.03 ± 0.13                   | >0.1                | 1.09 ± 0.08                    | >0.1                |
| Crystallinity                                                 | 0.88 ± 0.04                       | >0.1                | 0.88 ± 0.08                   | >0.1                | 0.89 ± 0.03                    | >0.1                |
| *The values are given as the mean and the standard deviation. |                                   |                     |                               |                     |                                |                     |
